# Supplementary figures and images for: ZnT8 Haploinsufficiency Impacts MIN6 Cell Zinc Content and β-Cell Phenotype via ZIP-ZnT8 Coregulation
Source: MDPI journal article supplement (doi:10.3390/ijms20215485), 2019-11-04

A

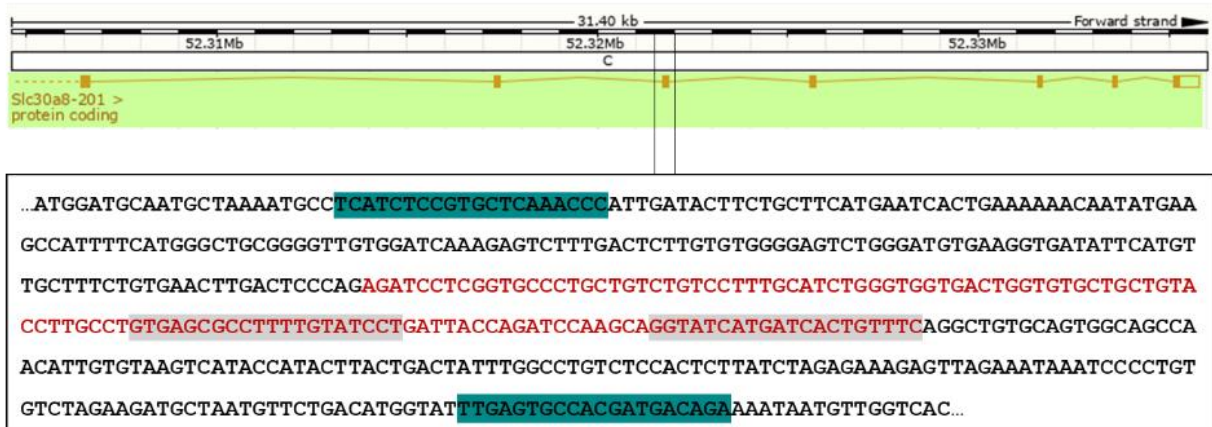

B

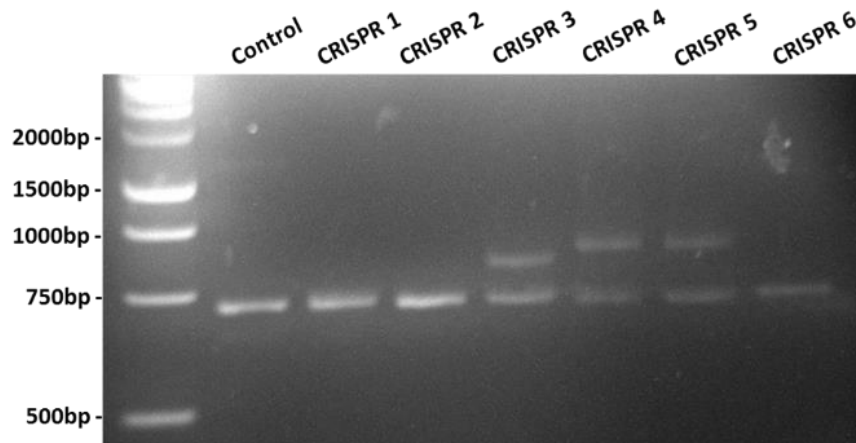

Supplement: s1 [file s1]
